# Supplementary material for: SARS-CoV-2 Humoral Immunity Persists Following Rituximab Therapy
Source: MDPI journal article supplement (doi:10.3390/vaccines11121864), 2023-12-18
Supplement: s1 [file s1]

## Supplementary Materials

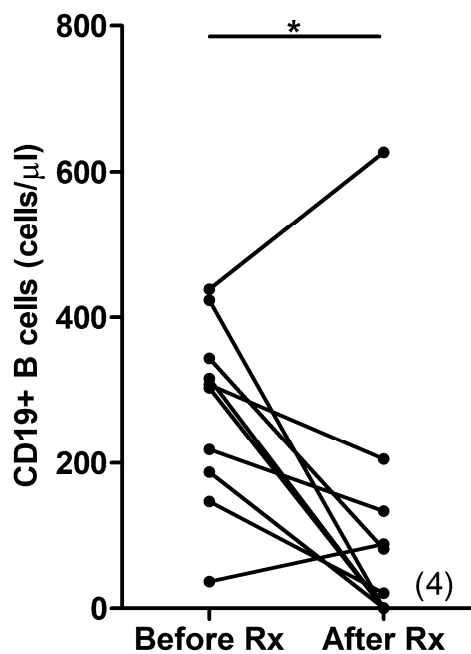

Figure S1: Total B cells (CD19+) counts before and ~6 months following Rituximab. The numerals in brackets denote the number of patients with (near) undetectable levels of total B cells. \* refers to  $p < 0.05$ .
